# Supplementary material
Source: publisher figshare collection journal article supplement (https://acs.figshare.com/ndownloader/files/4258003)
Supplement: Supplementary file 1 [file 4258003]

## Supporting Information

### **Different Effects of a Co-template and $[\text{TM}(\text{phen})_m]^{2+}$ ( $m = 1-3$ ) Complex Cations on the Self-assembly of a Series of Hybrid Selenidostannates Showing Combined Optical Properties of Organic and Inorganic Components**

Guang-Ning Liu, Guo-Cong Guo,\* Ming-Jian Zhang, Jin-Shuang Guo, Hui-Yi Zeng, and Jin-Shun Huang

*State Key Laboratory of Structural Chemistry, Fujian Institute of Research on the Structure of Matter, Chinese Academy of Sciences, Fuzhou, Fujian 350002, P. R. China*

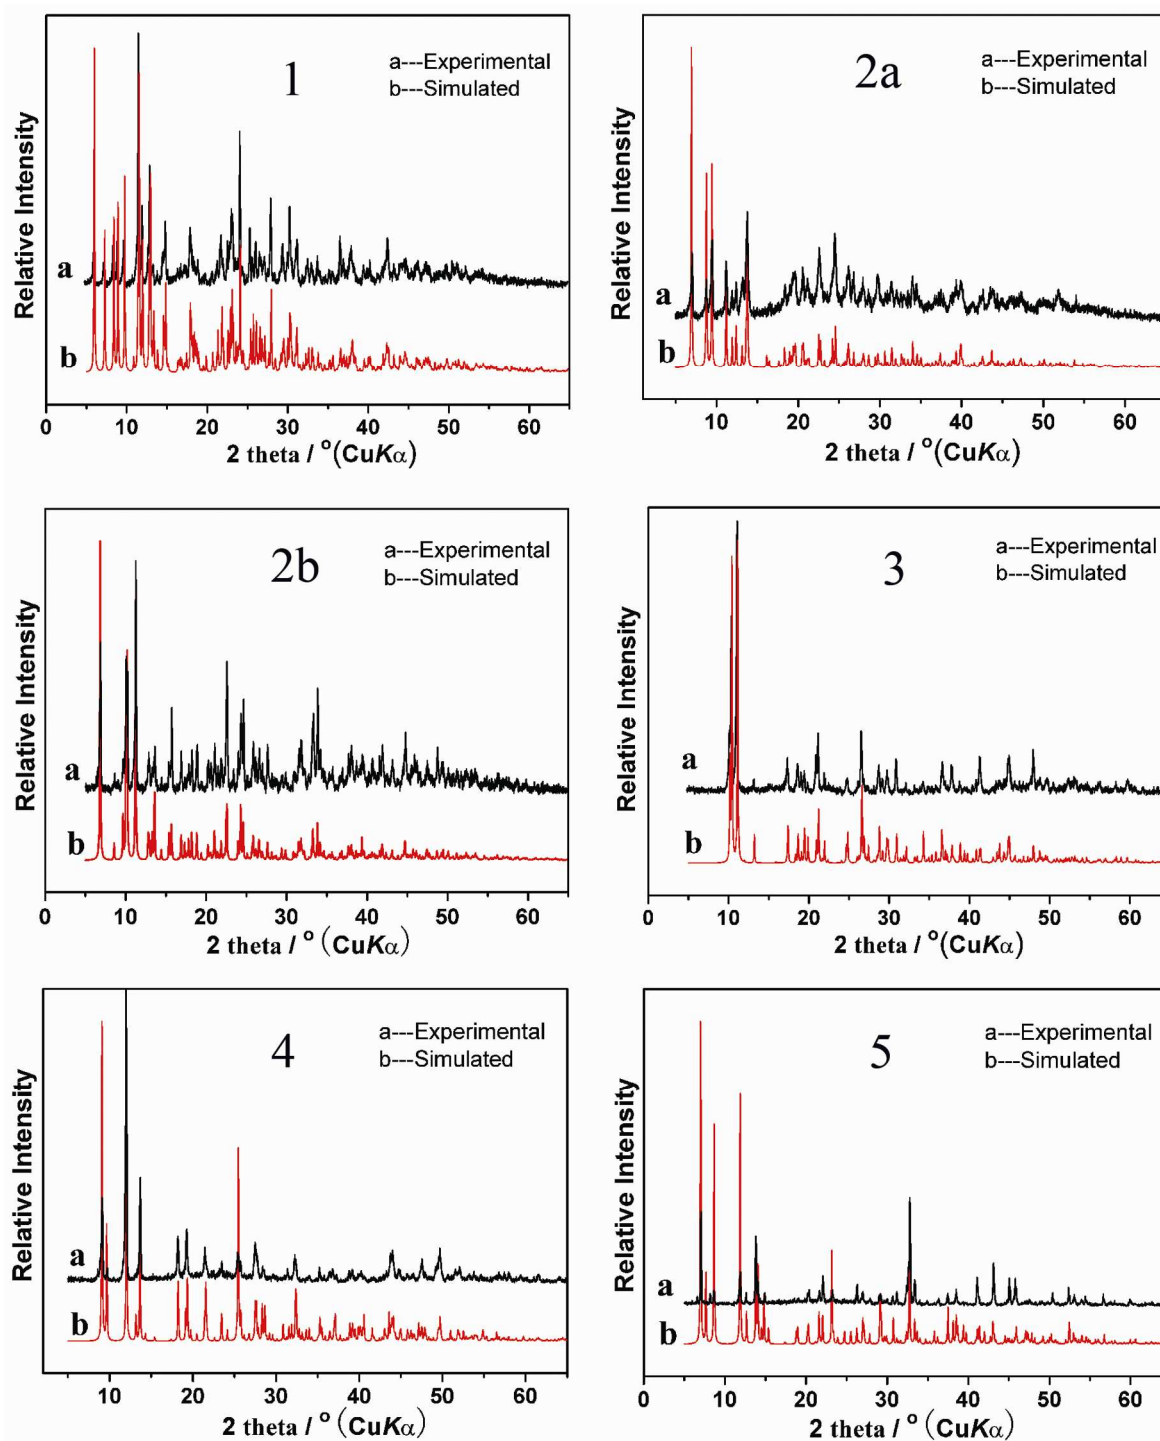

**Figure S1.** The experimental PXRD patterns of **1–5** (black) are in good agreement with their corresponding simulated PXRD patterns calculated from single-crystal X-ray data (red).

**Table S1.** Ranges of Selected Bond Distances (Å) and Angles (°) for **1–5**.

| <b>1</b> |                   |          |                        |
|----------|-------------------|----------|------------------------|
| Sn–Se    | 2.452(1)–2.602(1) | Se–Sn–Se | 93.654(13)–114.833(18) |

|           |                      |          |                     |
|-----------|----------------------|----------|---------------------|
| Sn–Se–Sn  | 86.346(13)           |          |                     |
| <b>2a</b> |                      |          |                     |
| Sn–Se     | 2.477(1)–2.582(1)    | Mn–Se    | 2.672(1)–2.704(1)   |
| Mn–N      | 2.292(2)–2.373(2)    | Se–Sn–Se | 93.96(2)–117.36(2)  |
| Sn–Se–Sn  | 86.04(2)             | N–Mn–N   | 70.97(8)–149.77(8)  |
| N–Mn–Se   | 89.69(5)–170.56(6)   | Se–Mn–Se | 92.48(2)            |
| <b>2b</b> |                      |          |                     |
| Sn–Se     | 2.468(1)–2.576(1)    | Fe–Se    | 2.599(1)–2.615(1)   |
| Fe–N      | 2.187(2)–2.263(2)    | Se–Sn–Se | 95.01(1)–117.61(1)  |
| Sn–Se–Sn  | 84.993(11)           | N–Fe–N   | 73.96(8)–153.07(8)  |
| N–Fe–Se   | 87.95(5)–172.86(6)   | Se–Fe–Se | 93.97(1)            |
| <b>3</b>  |                      |          |                     |
| Sn–Se     | 2.468(2)–2.559(1)    | Mn–Se    | 2.608(1)–2.742(2)   |
| Mn–N      | 2.236(3)–2.247(3)    | Se–Sn–Se | 95.52(4)–118.46(3)  |
| Sn–Se–Sn  | 84.48(4)             | N–Mn–N   | 74.22(10)           |
| N–Mn–Se   | 91.36(8)–162.86(6)   | Se–Mn–Se | 92.85(5)–102.34(3)  |
| <b>4</b>  |                      |          |                     |
| Sn–Se     | 2.454(1)–2.574(1)    | Mn–Se    | 2.682(1)            |
| Mn–N      | 2.278(3)–2.375(3)    | Se–Sn–Se | 93.83(2)–118.81(2)  |
| Sn–Se–Sn  | 86.17(2)–97.93(3)    | N–Mn–N   | 71.69(8)–145.37(13) |
| N–Mn–Se   | 91.37(5)–161.02(5)   | Se–Mn–Se | 104.45(3)           |
| <b>5</b>  |                      |          |                     |
| Sn–Se     | 2.515(1)–2.798(1)    | Fe–N     | 1.970(3)–1.977(3)   |
| Se–Sn–Se  | 86.98(1)–176.09(2)   | Sn–Se–Sn | 85.64(1)–96.02(2)   |
| N–Fe–N    | 83.13(11)–173.22(10) |          |                     |

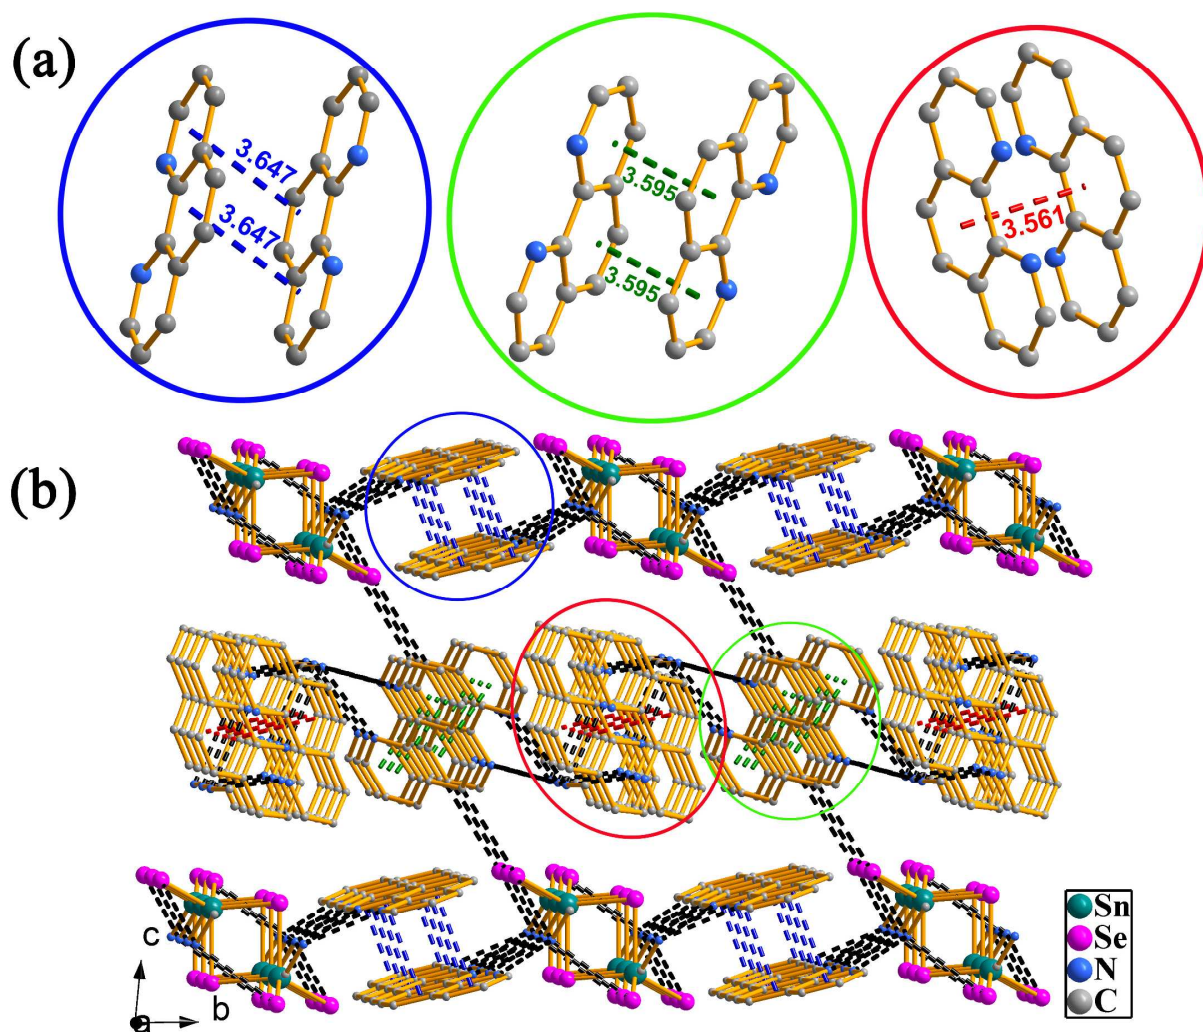

**Figure S2.** (a) View of three kinds of face-to-face  $\pi\cdots\pi$  stacking interactions in **1** (shown in blue, green, and red dashed lines, respectively). (b) View of a 3-D supramolecular network of **1** along the *a* axis showing C–H $\cdots$ Se, N–H $\cdots$ Se and N–H $\cdots$ N hydrogen bonds (black dashed lines) and face-to-face  $\pi\cdots\pi$  stacking interactions. Hydrogen atoms are omitted for clarity.

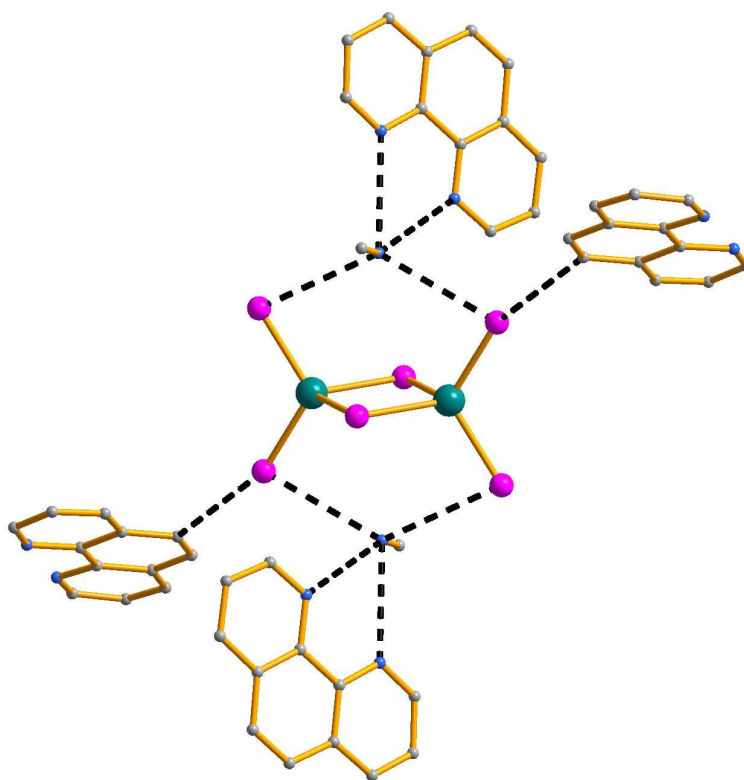

**Figure S3.** View of surrounding of a  $(\text{Sn}_2\text{Se}_6)^{4-}$  anion in **1**, showing the hydrogen bonds between the co-template and the  $(\text{Sn}_2\text{Se}_6)^{4-}$  anion (black dashed lines).

**Table S2.** Selected Hydrogen Bonds Data for **1**.

| D–H...A                     | D–H (Å) | H...A (Å) | D...A (Å) | ∠(DHA) (°) |
|-----------------------------|---------|-----------|-----------|------------|
| N1–H1C...Se3                | 0.89    | 2.61      | 3.471(3)  | 164        |
| N1–H1A...Se1 <sup>a</sup>   | 0.89    | 2.61      | 3.451(3)  | 159        |
| N1–H1B...N11 <sup>b</sup>   | 0.89    | 2.23      | 3.083(3)  | 160        |
| N1–H1B...N12 <sup>b</sup>   | 0.89    | 2.36      | 2.978(4)  | 127        |
| N2–H2B...N21                | 0.89    | 2.12      | 2.937(5)  | 152        |
| N2–H2B...N22                | 0.89    | 2.61      | 3.270(5)  | 132        |
| N2–H2C...N31                | 0.89    | 2.17      | 2.883(5)  | 137        |
| N2–H2C...N32                | 0.89    | 2.36      | 3.156(5)  | 148        |
| C36–H36A...Se1 <sup>c</sup> | 0.93    | 2.93      | 3.826(4)  | 163        |

Symmetry codes: a 2–x, 1–y, 2–z; b x, –1+y, z; c 2–x, 2–y, 1–z.

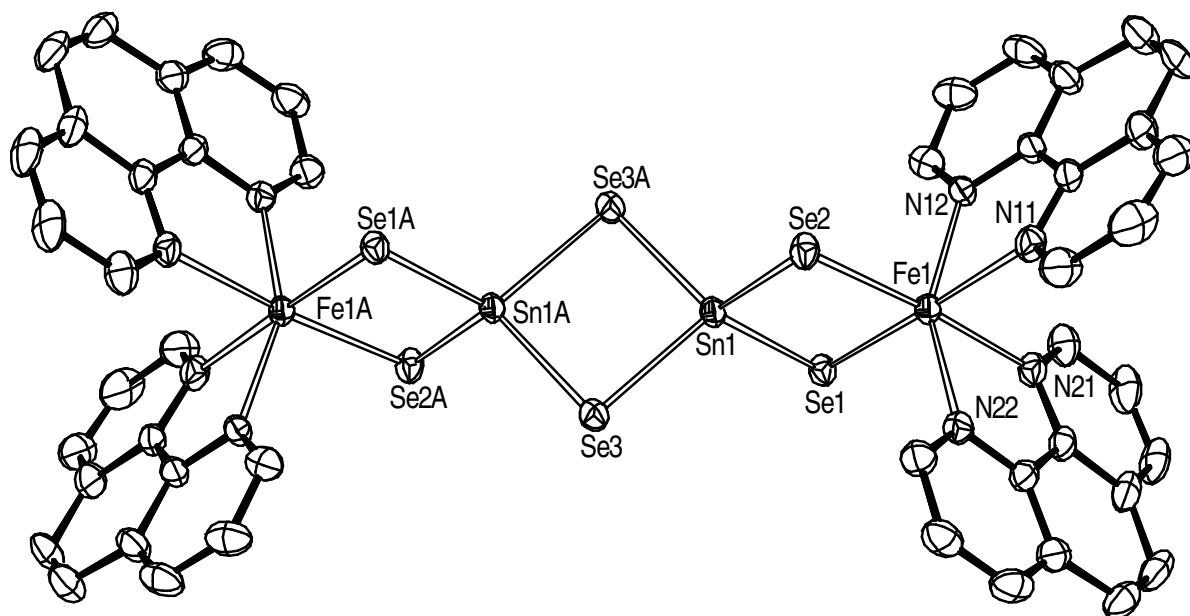

**Figure S4.** ORTEP drawing of **2b** with 30% thermal ellipsoids and hydrogen atoms being omitted for clarity. Symmetry code: A (1-x, 2-y, 1-z).



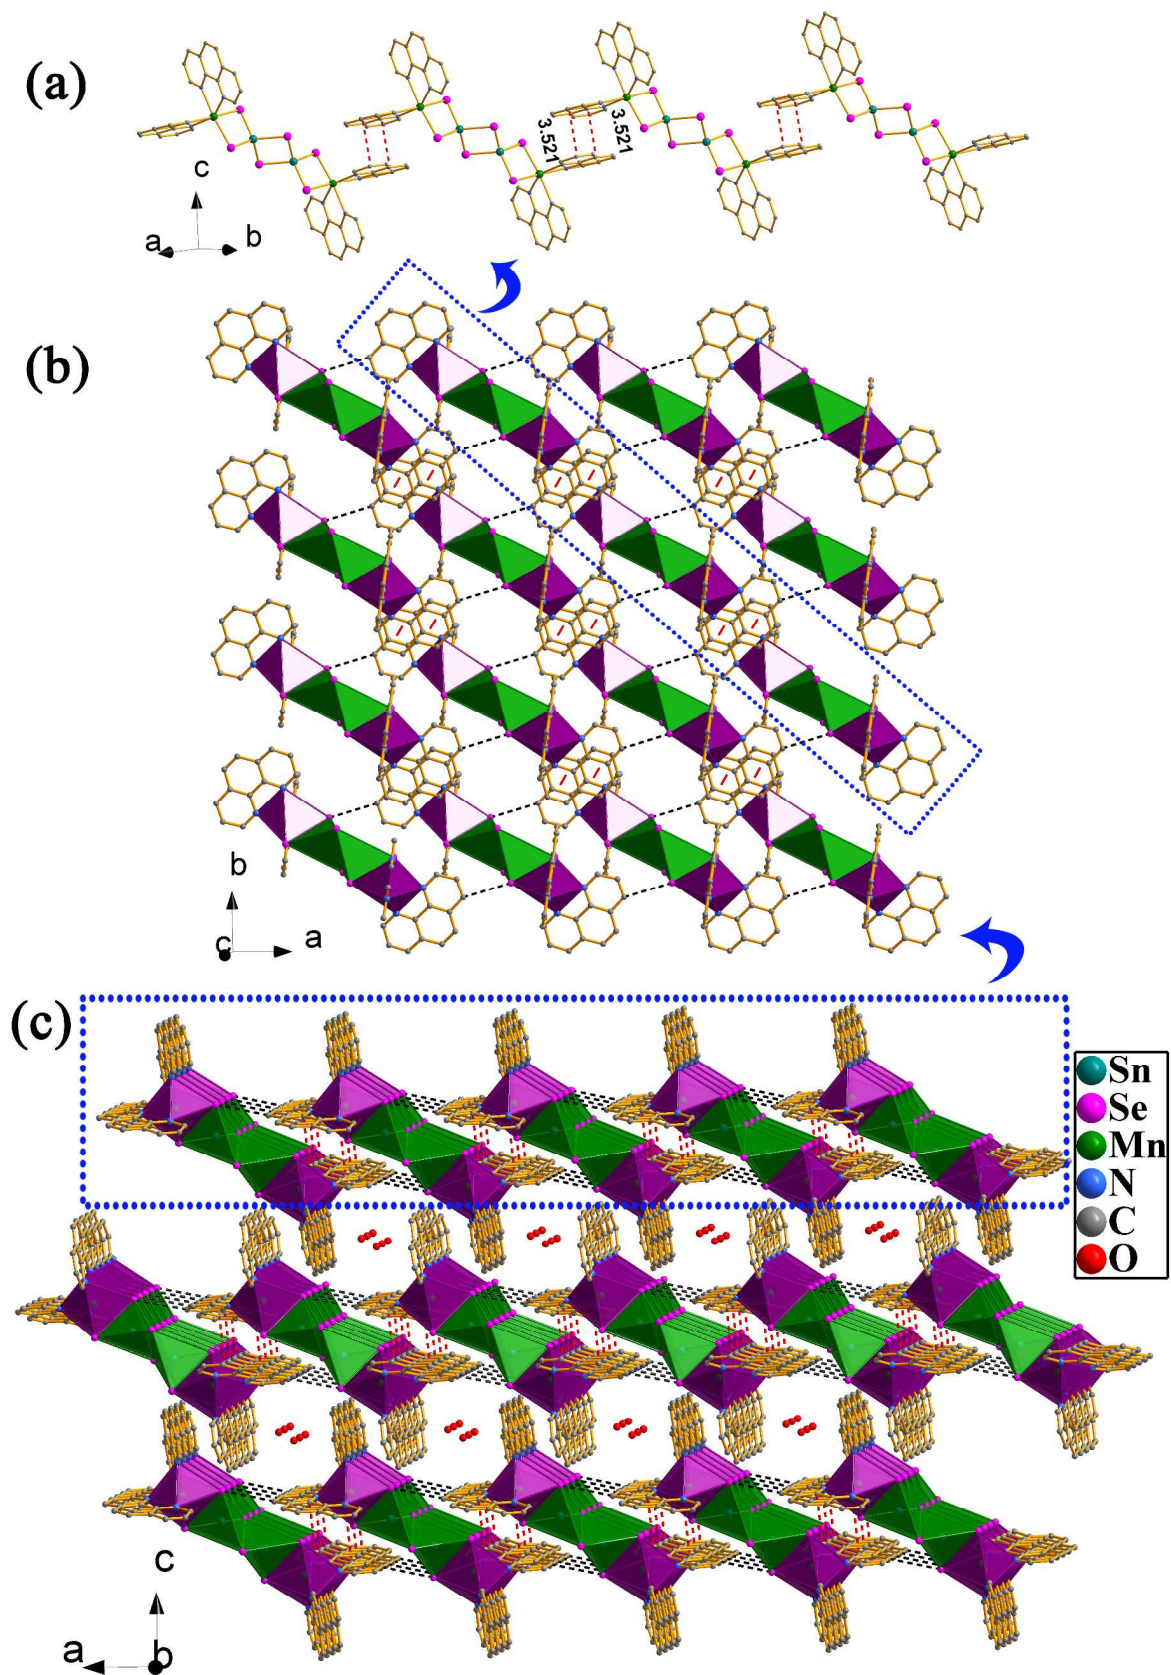

**Figure S5.** (a) View of a chain structure of **2a** assembled by the face-to-face  $\pi \cdots \pi$  stacking interactions (red dashed lines). (b) Polyhedral representation of a 2-D extended layer structure

of **2a** showing hydrogen bonds (black dashed lines) and  $\pi\cdots\pi$  stacking interactions. (3) 3-D packing diagram of **2a**. Purple octahedron: (MnSe<sub>2</sub>N<sub>4</sub>); green tetrahedron: (SnSe<sub>4</sub>).

**Table S3.** Selected Hydrogen Bonds Data for **2a**.

| D–H $\cdots$ A                     | D–H (Å) | H $\cdots$ A (Å) | D $\cdots$ A (Å) | $\angle$ (DHA) (°) |
|------------------------------------|---------|------------------|------------------|--------------------|
| C13–H10C $\cdots$ Se1 <sup>a</sup> | 0.93    | 2.95             | 3.675(4)         | 136                |

Symmetry code: a 1+x, y, z.



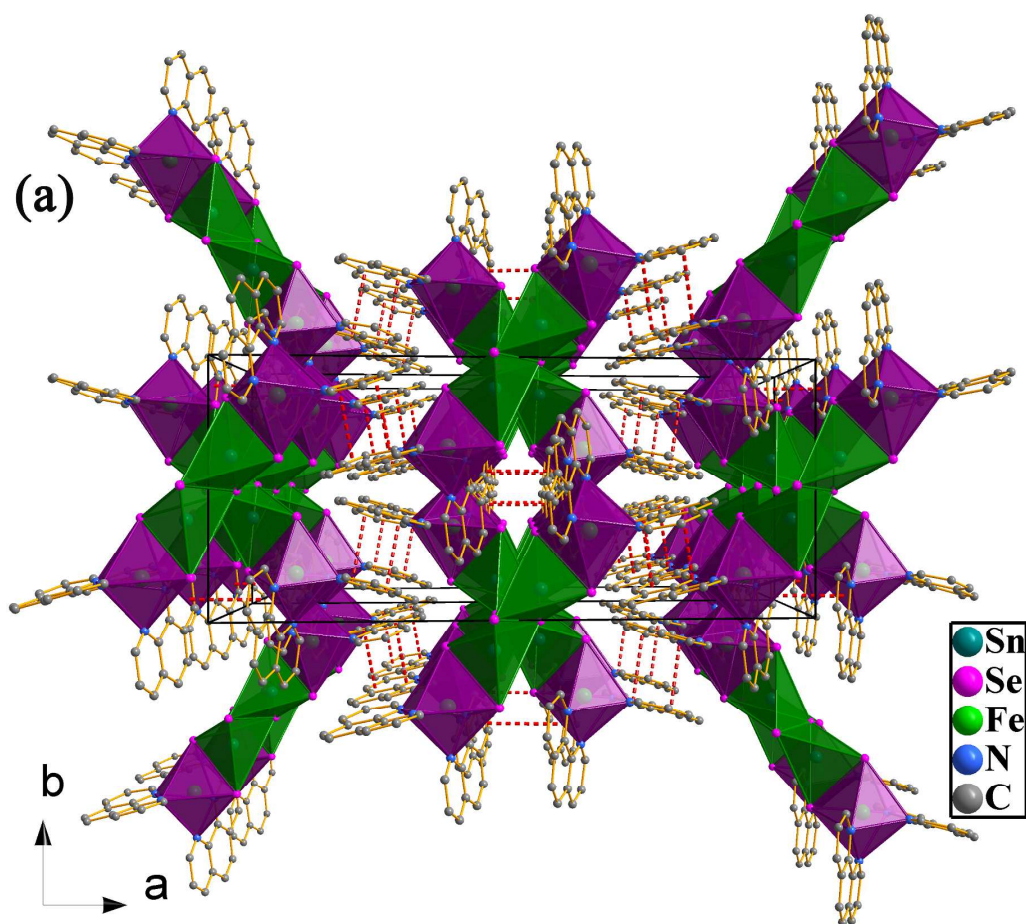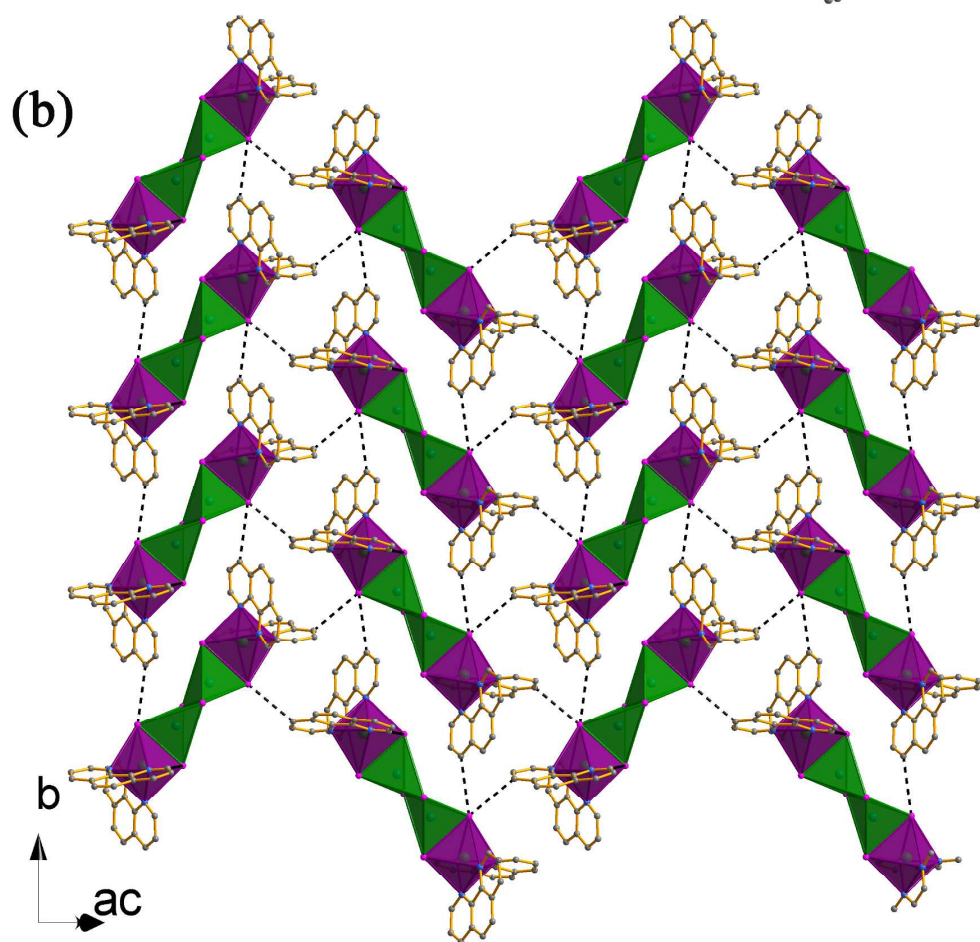

**Figure S6.** (a) Polyhedral view of the 3-D supramolecular framework of **2b** along the *c* axis assembled by the face-to-face  $\pi\cdots\pi$  stacking interactions (red dashed lines). (b) Polyhedral view of a layer structure of **2b** assembled by the intermolecular C–H $\cdots$ Se hydrogen bonds (black dashed lines). Purple octahedron: (MnSe<sub>2</sub>N<sub>4</sub>); green tetrahedron: (SnSe<sub>4</sub>).

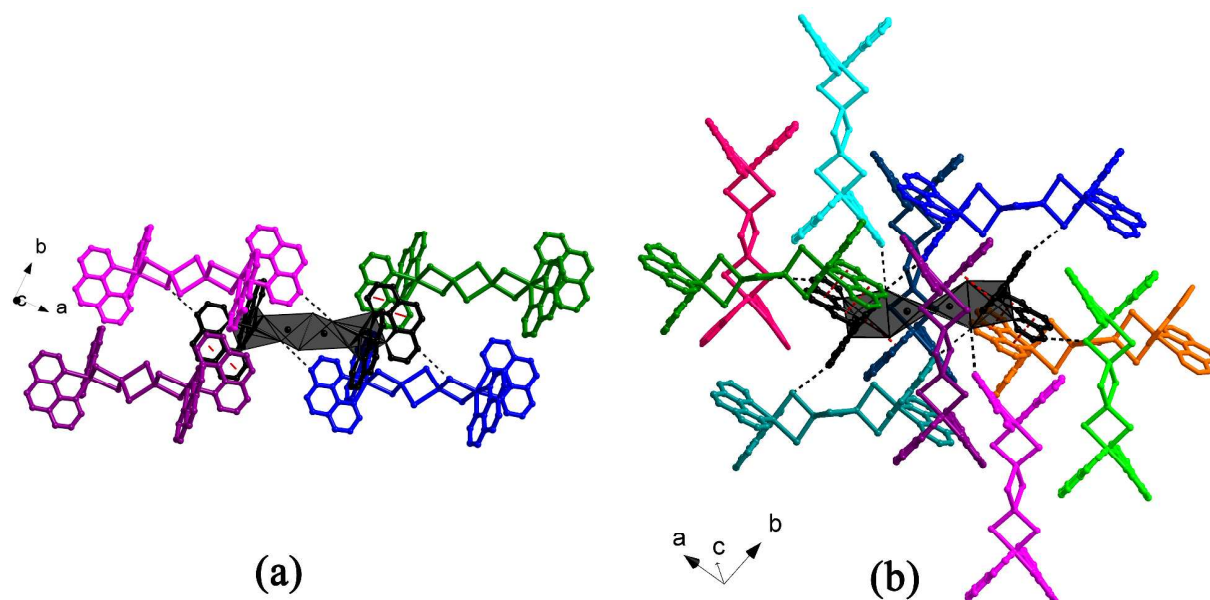

**Figure S7.** View of the surroundings of a neutral  $\{[\text{TM}(\text{phen})_2]_2(\mu_2\text{-Sn}_2\text{Se}_6)\}$  molecule (where the (MnSe<sub>2</sub>N<sub>4</sub>) and (SnSe<sub>4</sub>) units are shown as black polyhedra) in **2a** (TM = Mn, (a)) and **2b** (TM = Fe, (b)), showing C–H $\cdots$ Se hydrogen bonds and face-to-face  $\pi\cdots\pi$  stacking interactions.

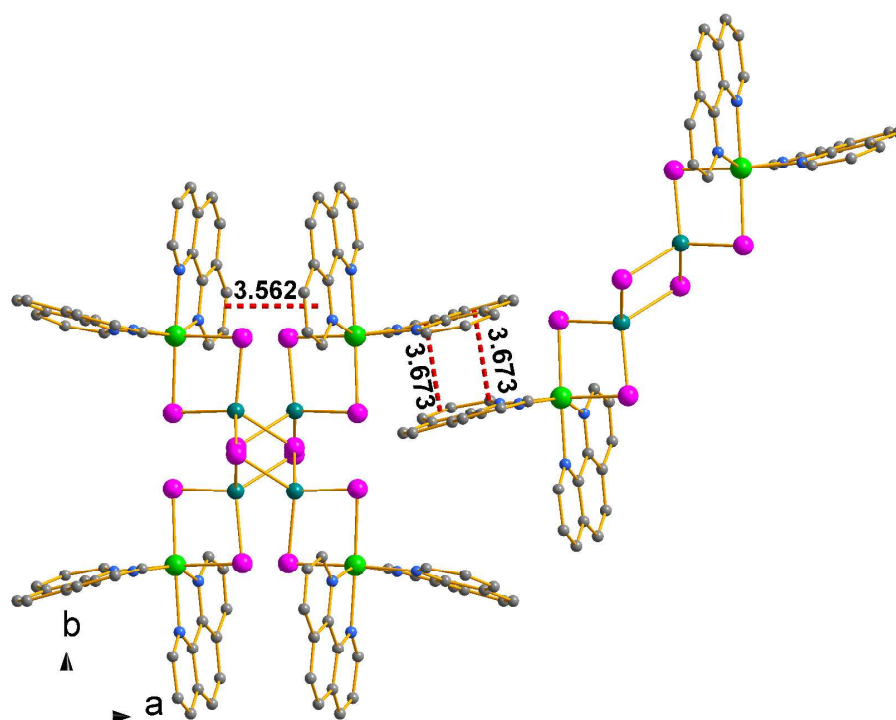

**Figure S8.** View of the face-to-face  $\pi\cdots\pi$  stacking interactions in **2b** (red dashed lines).

**Table S4.** Selected Hydrogen Bonds Data for **2b**.

| D–H $\cdots$ A                     | D–H (Å) | H $\cdots$ A (Å) | D $\cdots$ A (Å) | $\angle$ (DHA) (°) |
|------------------------------------|---------|------------------|------------------|--------------------|
| C13–H13A $\cdots$ Se2 <sup>a</sup> | 0.93    | 2.93             | 3.666(3)         | 137                |
| C23–H23A $\cdots$ Se2 <sup>b</sup> | 0.93    | 2.89             | 3.759(3)         | 157                |

Symmetry codes: a  $3/2-x, -1/2+y, 3/2-z$ ; b  $x, -1+y, z$ .

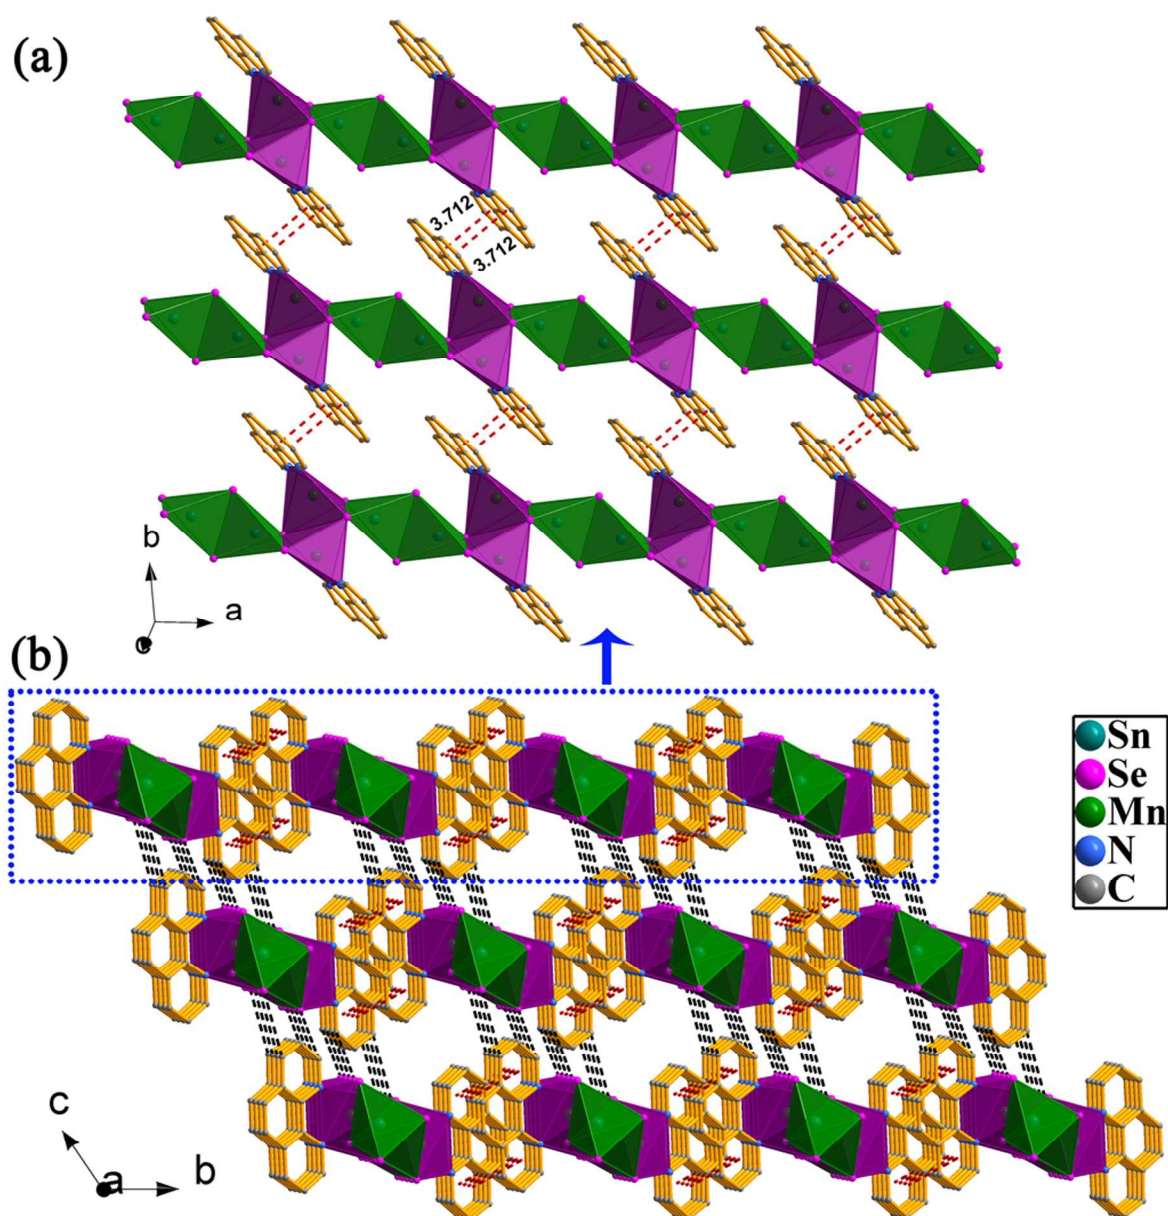

**Figure S9.** (a) Polyhedral representation of a 2-D extended layer structure of **3** showing  $\pi \cdots \pi$  stacking interactions (red dashed lines). (b) Polyhedral view of the 3-D supramolecular framework of **3** along the *a* axis showing hydrogen bonds (black dashed lines) and  $\pi \cdots \pi$  stacking interactions. Purple octahedron: (MnSe<sub>3</sub>N<sub>2</sub>); green tetrahedron: (SnSe<sub>4</sub>). Hydrogen atoms are omitted for clarity.

**Table S5.** Selected Hydrogen Bonds Data for **3**.

| D–H $\cdots$ A                   | D–H (Å) | H $\cdots$ A (Å) | D $\cdots$ A (Å) | $\angle(\text{DHA})$ (°) |
|----------------------------------|---------|------------------|------------------|--------------------------|
| C3–H3A $\cdots$ Se2 <sup>a</sup> | 0.93    | 2.92             | 3.691(4)         | 141                      |



Symmetry code: a 1+x, y, 1+z; b 1-x, 1-y, 2-z.

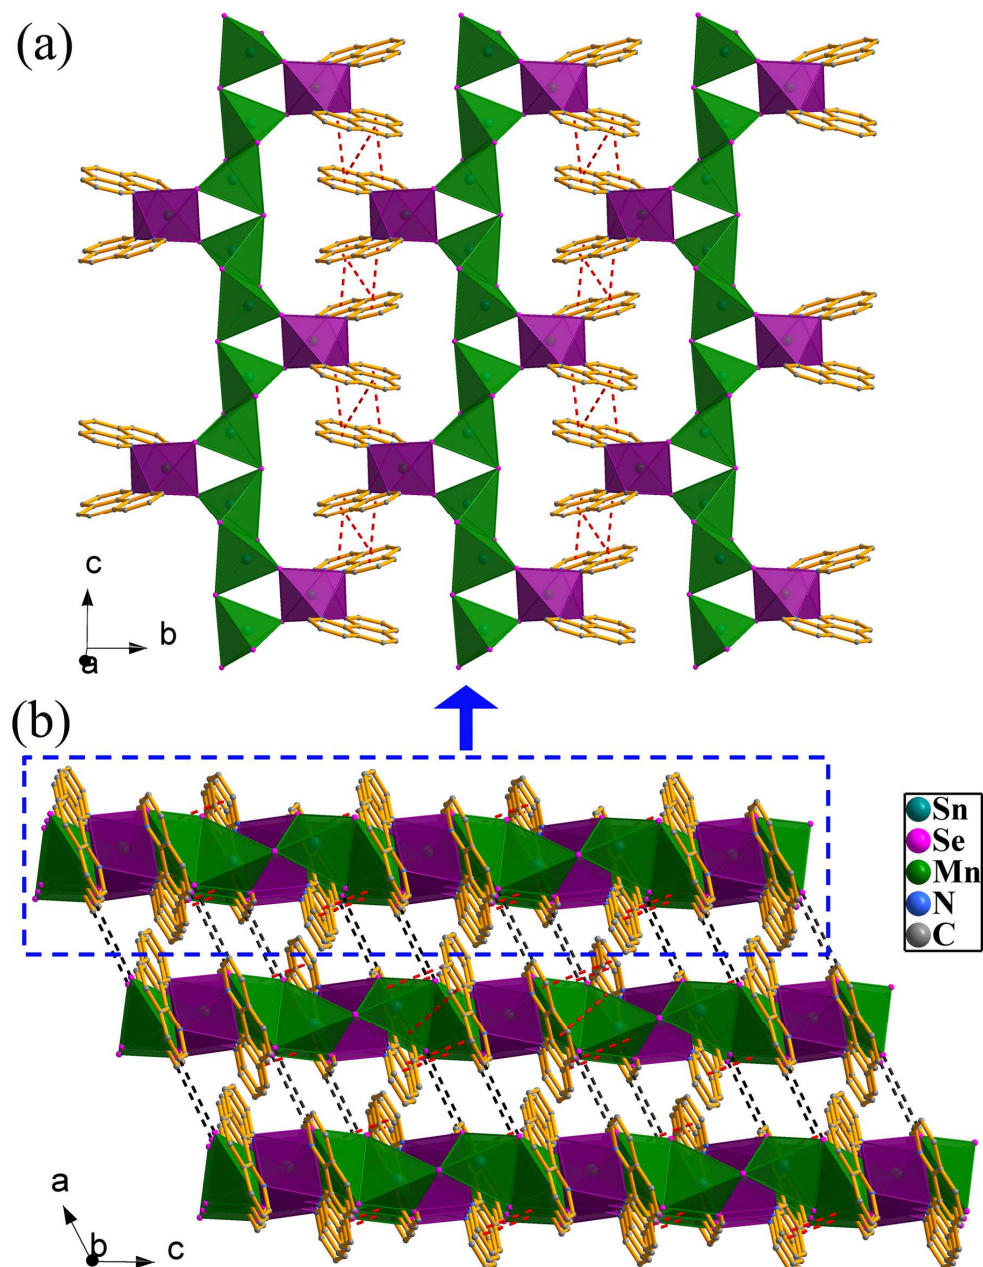

**Figure S10.** (a) Polyhedral representation of a 2-D extended layer structure of **4** showing  $\pi \cdots \pi$  stacking interactions (red dashed lines). (b) Polyhedral view of the 3-D supramolecular framework of **4** along the *b* axis showing hydrogen bonds (black dashed lines) and  $\pi \cdots \pi$  stacking interactions. Purple octahedron: (MnSe<sub>2</sub>N<sub>4</sub>); green tetrahedron: (SnSe<sub>4</sub>). Hydrogen atoms are omitted for clarity.

**Table S6.** Selected Hydrogen Bonds Data for **4**.

| D–H...A                     | D–H (Å) | H...A (Å) | D...A (Å) | ∠(DHA) (°) |
|-----------------------------|---------|-----------|-----------|------------|
| C19–H19A...Se3 <sup>a</sup> | 0.93    | 3.03      | 3.779(4)  | 139        |

Symmetry code: a 3/2-x, 1/2+y, 3/2-z.

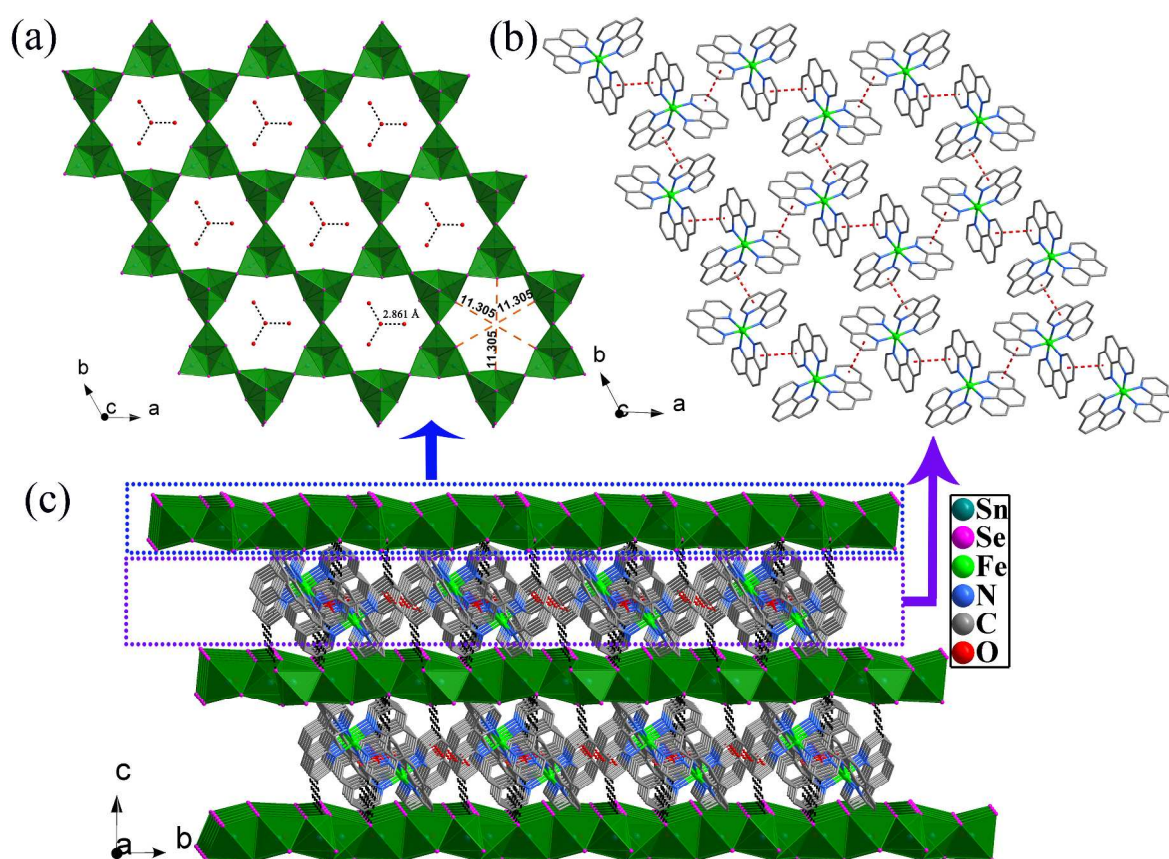

**Figure S11.** (a) Polyhedral representation of a  $2_{\infty}(\text{Sn}_3\text{Se}_7^{2-})$  layer structure of **5** with lattice water molecules residing in the honeycomb-like hole. (b) View of the 2-D extended layer structure of the  $[\text{Fe}(\text{phen})_3]^{2+}$  complex cations assembled by face-to face  $\pi\cdots\pi$  stacking interactions (red dashed lines). (c) Polyhedral view of the 3-D supramolecular framework of **5** along the  $a$  axis. Green polyhedron:  $(\text{SnSe}_5)$ . Hydrogen atoms are omitted for clarity.

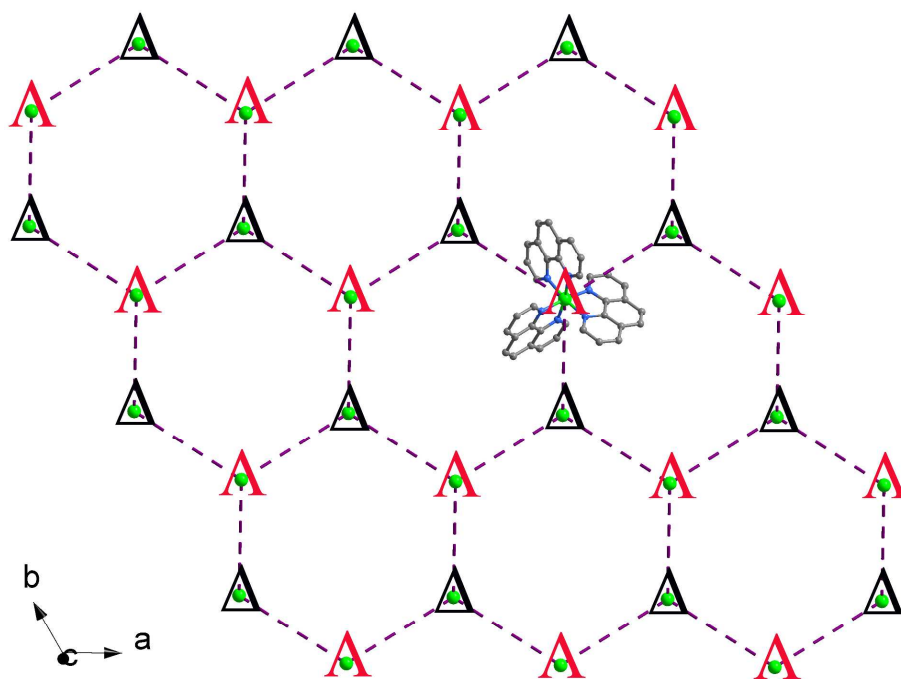

**Figure S12.** Topological view of the 2-D supramolecular  $[\text{Fe}(\text{phen})_3]_n^{2n+}$  layer of **5** with the  $[\text{Fe}(\text{phen})_3]^{2+}$  complex cation as a 3-connected node, and the configuration of the Fe complexes ( $\Lambda$  or  $\Delta$ ) labeled on the nodes.

**Table S7.** Selected Hydrogen Bonds Data for **5**.

| D–H...A      | D–H (Å) | H...A (Å) | D...A (Å) | $\angle(\text{DHA})$ (°) |
|--------------|---------|-----------|-----------|--------------------------|
| C9–H9A...Se1 | 0.93    | 2.97      | 3.716(4)  | 138                      |



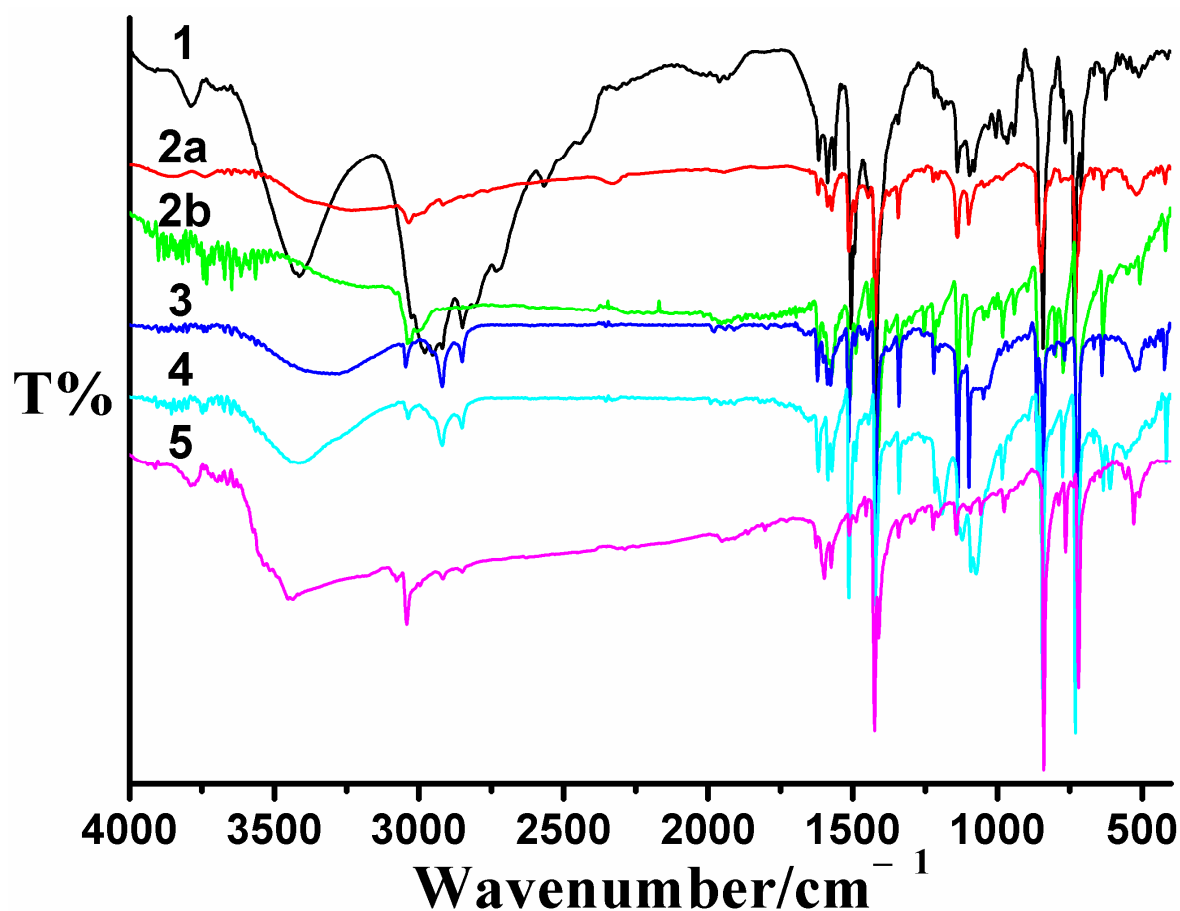

**Figure S13.** IR spectra of **1–5**.

In the IR spectra of **1–5** (Figure S13), the relatively weak bands in the region of  $3081\text{--}3034\text{ cm}^{-1}$  are attributed to the C–H vibrations of the aromatic ring hydrogen atoms,  $\nu(\text{C–H})$ . The bands of ring vibrations of the phen ligand ( $\nu(\text{C=C})$  and  $\nu(\text{C=N})$ ) are observed at  $1631\text{--}1415\text{ cm}^{-1}$ . Region  $776\text{--}720\text{ cm}^{-1}$  is attributed to  $\delta(\text{C–H})$ , due to out of plane motion of hydrogen atoms of heterocyclic rings. For **1**, the IR bands at  $2728$  and  $2564\text{ cm}^{-1}$  correspond to the  $\text{–CH}_3$  stretching and  $\text{–NH}_3^+$  twisting vibrations, respectively. The occurrence of these resonance signals confirms the presence of mono-protonated methylamine molecules in **1**. The broad bands in the range of  $3446\text{--}3315\text{ cm}^{-1}$  for **1** and **2b–4** are assigned to the stretching of trace water since the measurements were conducted in air, while the broad band for **2a** and **5** is simultaneously ascribed to the trace water in air and its lattice water molecules.

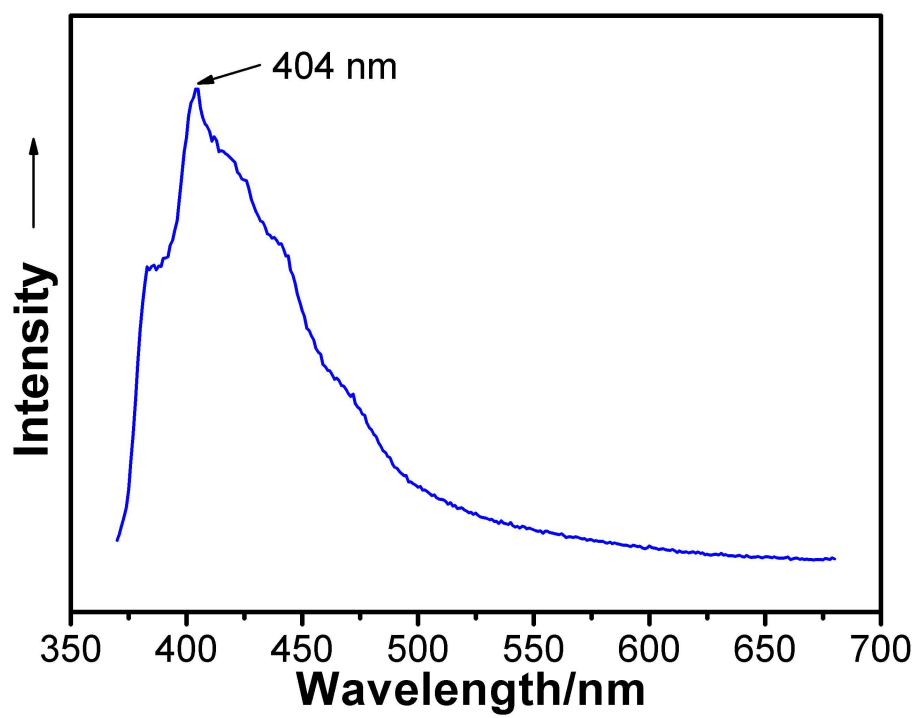

**Figure S14.** Solid-state photoluminescence spectrum of pure phen ligand measured at room temperature.

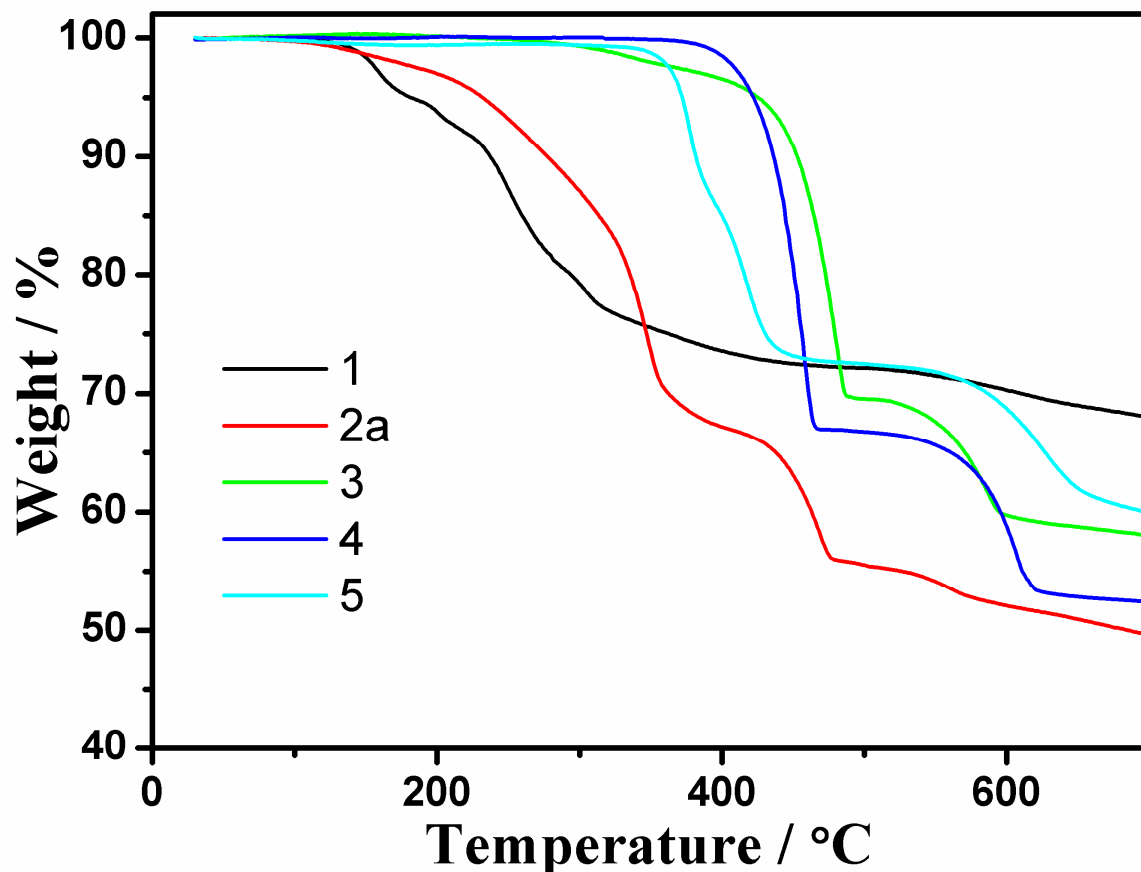

**Figure S15.** TGA curves of **1**, **2a** and **3–5**.

The thermal stabilities of **1**, **2a**, and **3–5** were examined by thermogravimetric analyses (TGA) in a N<sub>2</sub> atmosphere from 30 to 700 °C with the TGA curves shown in Figure S15. The TGA curve of **1** shows that compound **1** is stable up to 114 °C. A total weight loss of 8.4% in the temperature range 114–223 °C is attributed to the removal of four methylamine (calcd: 6.5%) and two H<sub>2</sub>S (3.6%) molecules per formula and the weight loss occurred in the temperature range 223–700 °C is consistent with the removal of the phen molecules. TGA for **2a** revealed a small weight loss of 1.9% between 84 and 169 °C, which corresponds to the removal of one lattice water molecule per formula (calcd: 1.1%). Further two-step weight losses from 169 to 508 °C with a significant weight loss of 44.6% is in agreement with the release of four phen molecules per formula (calcd: 45.7%). From the shape of the curve of **3**, it can be seen that the phen ligands are lost in one main step, and the observed weight loss of 30.4% in the temperature range of 262–501 °C agrees well with the calculated value of 30.5%. Compound **4** is more stable than **1**, **2a**, and **3**, and displays a clean one step loss with the

decomposition temperature at 353 °C. The corresponding weight loss of 33.2% to 505 °C is comparable with the complete loss of the phen molecules (calcd: 34.4%). For **5**, a small weight change of 0.7% in the temperature range of 59–203 °C is attributed to the removal of the lattice water molecules (calcd: 1.5%), and the following weight loss of 39.7% before 683 °C is comparable with the complete loss of the phen molecules (calcd: 35.4%).
